# Supplementary material for: Revisiting two thiophosphate compounds constituting d0transition metal HfP2S6and d10transition metal α-Ag4P2S6as multifunctional materials for combining second harmonic generation response and photocurrent response
Source: Royal Society of Chemistry journal article supplement (doi:10.1039/d2ce01576e), 2023-01-01
Supplement: d2ce01576e1.pdf [file d2ce01576e1.pdf]

Revisiting two thiophosphate compounds constituting  $d^0$  transition metal:  $\text{HfP}_2\text{S}_6$  and  $d^{10}$  transition metal:  $\alpha\text{-Ag}_4\text{P}_2\text{S}_6$  as multifunctional materials for combining second harmonic generation response and photocurrent response

Craig Cropek <sup>a, #</sup>, Bingheng Ji <sup>a, #</sup>, Arka Sarkar <sup>b</sup>, Fei Wang <sup>c</sup>, Tajamul Hussain Syed <sup>d</sup>, Wei Wei <sup>d</sup>, Sheng-Ping Guo <sup>e</sup>, Jian Wang <sup>a \*</sup>

<sup>a</sup> *Department of Chemistry and Biochemistry, Wichita State University, Wichita, Kansas 67260, United States*

<sup>b</sup> *Department of Chemistry, Iowa State University, Ames, Iowa, 50011, United States*

<sup>c</sup> *Department of Chemistry, Missouri State University, Springfield, Missouri, 65897, United States*

<sup>d</sup> *Department of Mechanical Engineering, Wichita State University, Wichita, Kansas 67260, United States*

<sup>e</sup> *School of Chemistry and Chemical Engineering, Yangzhou University, Yangzhou, Jiangsu 225002, P. R. China*

<sup>#</sup> equally contributed.

Corresponding author: [jian.wang@wichita.edu](mailto:jian.wang@wichita.edu)

### Contents

1. **Figure S1.** Powder X-ray diffraction results of  $\text{HfP}_2\text{S}_6$  with simulated pattern listed.
2. **Figure S2.** Optical microscope photos of selected crystals of  $\text{HfP}_2\text{S}_6$  (left) and  $\alpha\text{-Ag}_4\text{P}_2\text{S}_6$  (right), the background is a 2 mm scale paper.
3. **Figure S3.** The crystal structures of  $\alpha\text{-Ag}_4\text{P}_2\text{S}_6$  and  $\beta\text{-Ag}_4\text{P}_2\text{S}_6$ .
4. **Figure S4.** High resolution synchrotron X-ray diffraction results of  $\alpha\text{-Ag}_4\text{P}_2\text{S}_6$  together with two polymorphic simulated models
5. **Figure S5.** Lab powder X-ray diffraction results of  $\alpha\text{-Ag}_4\text{P}_2\text{S}_6$  together with theoretical pattern.
6. **Figure S6.** PXRD results of  $\alpha\text{-Ag}_4\text{P}_2\text{S}_6$  and  $\beta\text{-Ag}_4\text{P}_2\text{S}_6$  samples after DSC treatments compared with theoretical patterns.

7. **Figure S7.** PXRD results of  $\alpha$ -Ag<sub>4</sub>P<sub>2</sub>S<sub>6</sub> samples annealed and quenched at different temperatures. The theoretical patterns are listed at the bottom.
8. **Figure S8.** PXRD results of samples synthesized via heating Ag+P+S elements at different temperatures. The theoretical patterns are listed at the bottom.
9. **Figure S9.** Calculated band structure of  $\alpha$ -Ag<sub>4</sub>P<sub>2</sub>S<sub>6</sub> from VASP.
10. **Figure S10.** Calculated band structure of HfP<sub>2</sub>S<sub>6</sub> from VASP.
11. **Figure S11.** Density of states of  $\alpha$ -Ag<sub>4</sub>P<sub>2</sub>S<sub>6</sub> calculated by TB-LMTO-ASA.
12. **Figure S12.** Band structure of  $\alpha$ -Ag<sub>4</sub>P<sub>2</sub>S<sub>6</sub> calculated by TB-LMTO-ASA.
13. **Figure S13.** The Kubelka-Munk diffuse reflectance plots of HfP<sub>2</sub>S<sub>6</sub> and  $\alpha$ -Ag<sub>4</sub>P<sub>2</sub>S<sub>6</sub>.
14. **Figure S14.** Tauc plots for allowed direct and indirect transitions of HfP<sub>2</sub>S<sub>6</sub>.
15. **Figure S15.** Tauc plots for allowed direct and indirect transitions of  $\alpha$ -Ag<sub>4</sub>P<sub>2</sub>S<sub>6</sub>.
16. **Figure S16.** The Kubelka-Munk diffuse reflectance plots of  $\beta$ -Ag<sub>4</sub>P<sub>2</sub>S<sub>6</sub>.
17. **Figure S17.** Tauc plots for allowed direct and indirect transitions of  $\beta$ -Ag<sub>4</sub>P<sub>2</sub>S<sub>6</sub>.
18. **Figure S18.** IR spectrum of HfP<sub>2</sub>S<sub>6</sub>,  $\alpha$ -Ag<sub>4</sub>P<sub>2</sub>S<sub>6</sub>, and  $\beta$ -Ag<sub>4</sub>P<sub>2</sub>S<sub>6</sub>.
19. **Figure S19.** SHG intensities of HfP<sub>2</sub>S<sub>6</sub> and AgGaS<sub>2</sub> were measured on variable particle size samples utilizing a 2.09  $\mu$ m laser.
20. **Figure S20.** Calculated birefringence of  $\alpha$ -Ag<sub>4</sub>P<sub>2</sub>S<sub>6</sub> versus wavelength of the fundamental light.
21. **Figure S21.** Calculated birefringence of HfP<sub>2</sub>S<sub>6</sub> versus wavelength of the fundamental light.
22. **Table S1.** LDT measurement results of Ag<sub>4</sub>P<sub>2</sub>S<sub>6</sub> and AgGaS<sub>2</sub> @ 1064 nm measured at samples of particle size of 225  $\mu$ m.
23. **Figure S22.** Photocurrent density of three samples of  $\alpha$ -Ag<sub>4</sub>P<sub>2</sub>S<sub>6</sub>.
24. **Figure S23.** Photocurrent density of two samples of  $\beta$ -Ag<sub>4</sub>P<sub>2</sub>S<sub>6</sub>.
25. **Table S2.** Photocurrent response of selected sulfides (ranked by photocurrent density from highest to lowest)

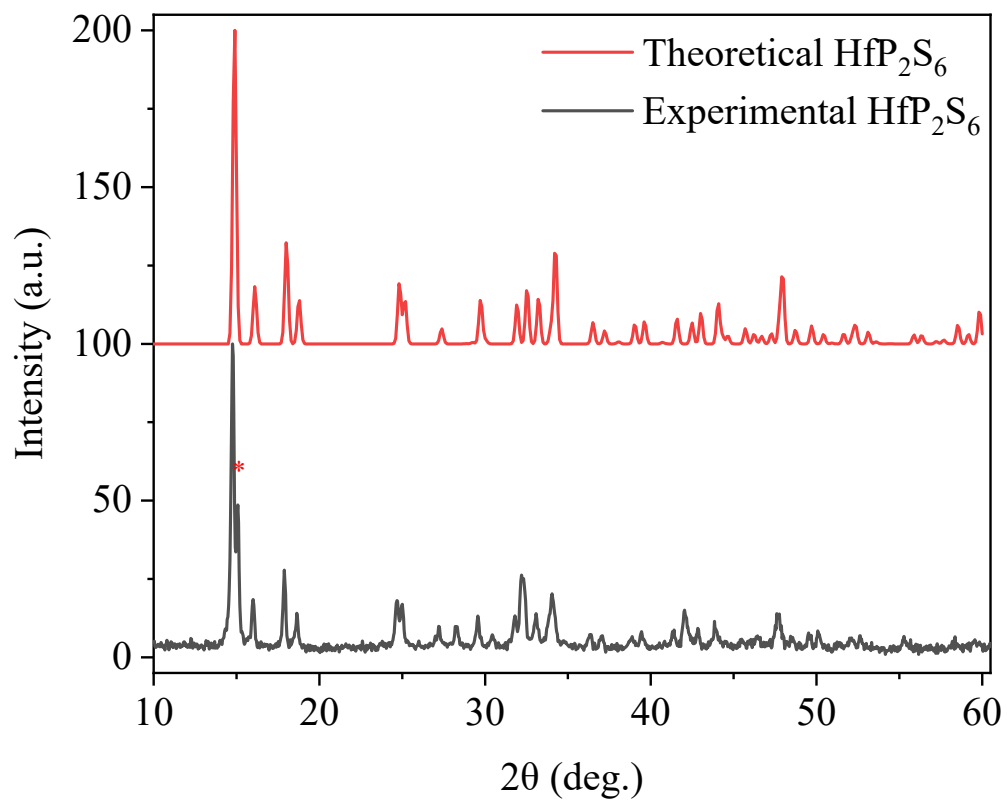

**Figure S1.** Theoretical and experimental powder XRD patterns of HfP<sub>2</sub>S<sub>6</sub>. The intrinsic impurity, HfS<sub>2</sub>, is labeled as a red asterisk.

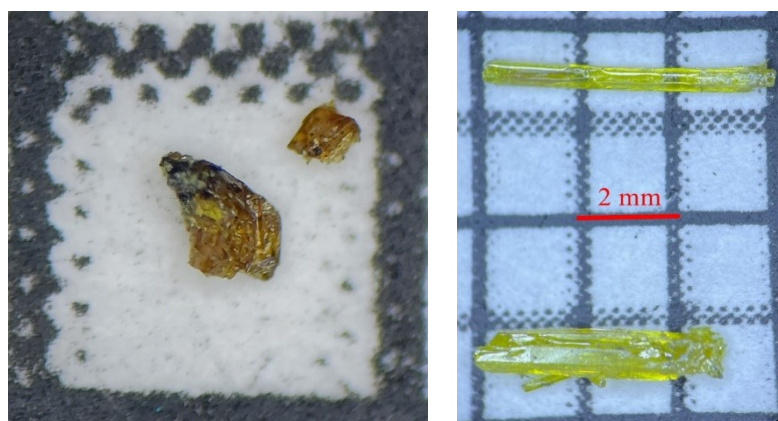

**Figure S2.** Optical microscope photos of selected crystals of  $\text{HfP}_2\text{S}_6$  (left) and  $\alpha\text{-Ag}_4\text{P}_2\text{S}_6$  (right), the background is a 2 mm scale paper.

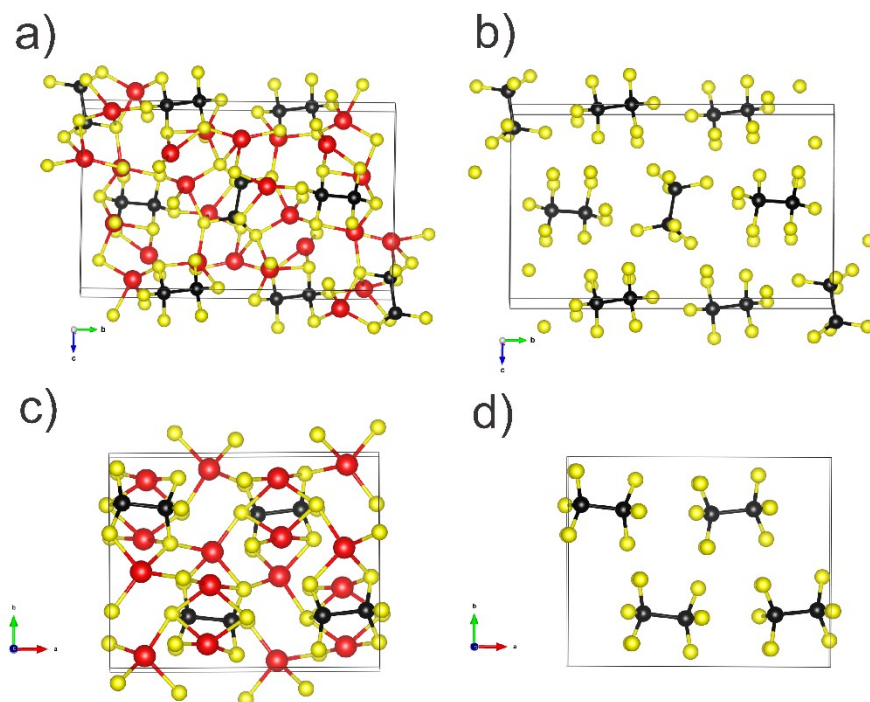

**Figure S3.** a) ball-stick model of  $\beta\text{-Ag}_4\text{P}_2\text{S}_6$  viewed along  $[100]$  direction. b) The arrangement of  $[\text{P}_2\text{S}_6]$  motifs within  $\beta\text{-Ag}_4\text{P}_2\text{S}_6$  viewed along  $[100]$  direction, Ag atoms are removed for clarity. c) ball-stick model of  $\alpha\text{-Ag}_4\text{P}_2\text{S}_6$  viewed along  $[001]$  direction. d) The arrangement of  $[\text{P}_2\text{S}_6]$  motifs within  $\alpha\text{-Ag}_4\text{P}_2\text{S}_6$  viewed along  $[001]$  direction, Ag atoms are removed for clarity. Ag: red color, P: black color, S: yellow color.

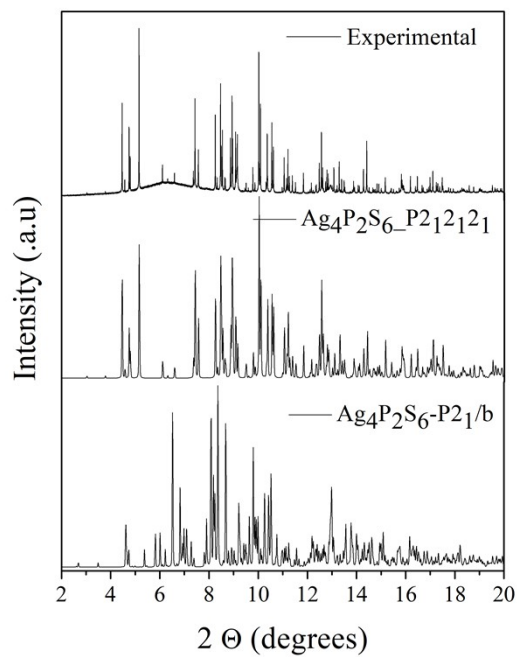

**Figure S4.** High resolution synchrotron X-ray diffraction results of  $\alpha$ -Ag<sub>4</sub>P<sub>2</sub>S<sub>6</sub> together with two polymorphic simulated models.

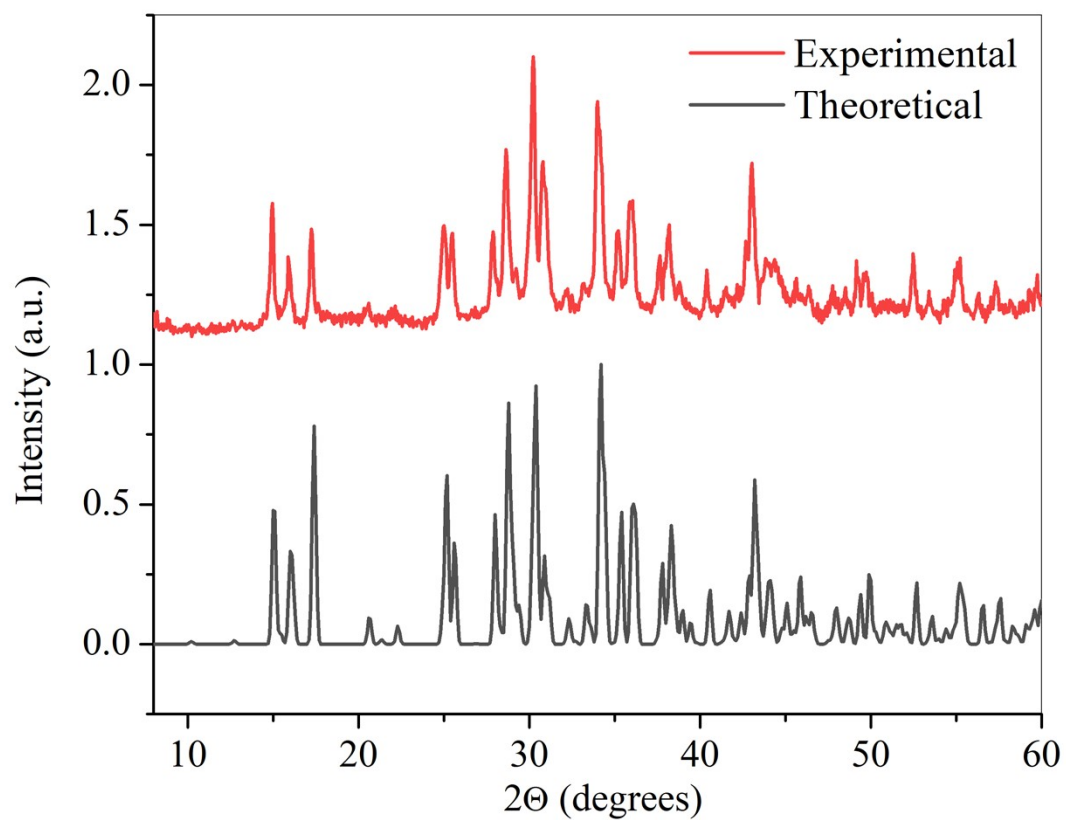

**Figure S5.** Lab powder X-ray diffraction results of  $\alpha$ - $\text{Ag}_4\text{P}_2\text{S}_6$  together with theoretical pattern.

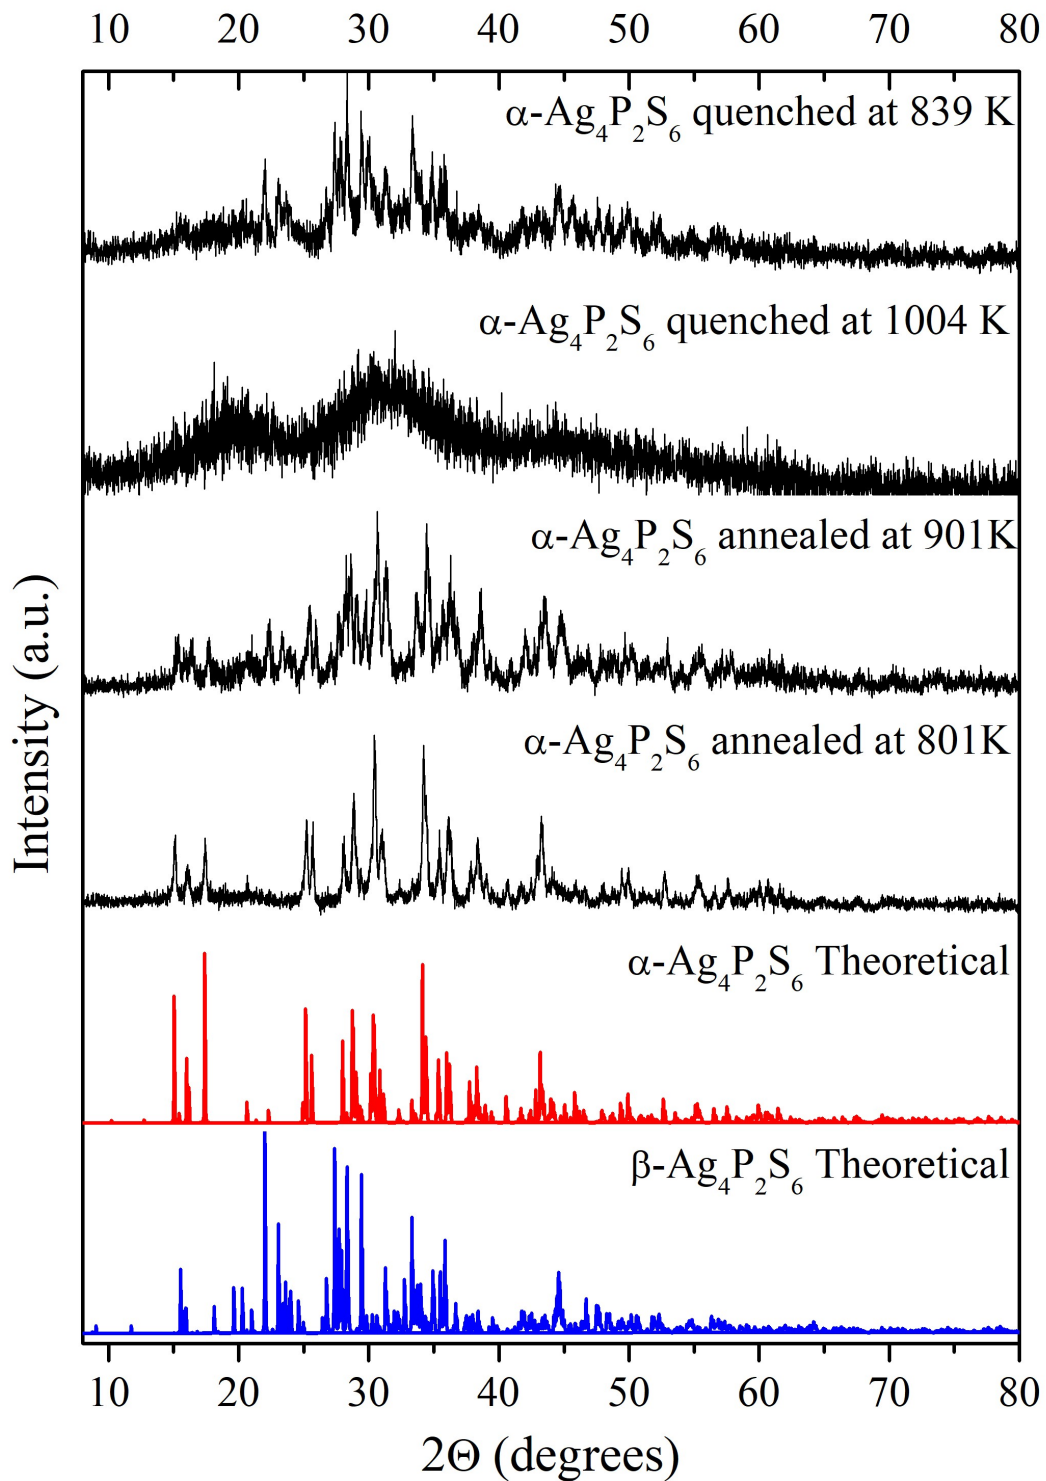

**Figure S6.** PXRD results of  $\alpha\text{-Ag}_4\text{P}_2\text{S}_6$  and  $\beta\text{-Ag}_4\text{P}_2\text{S}_6$  samples after DSC treatments compared with theoretical patterns.

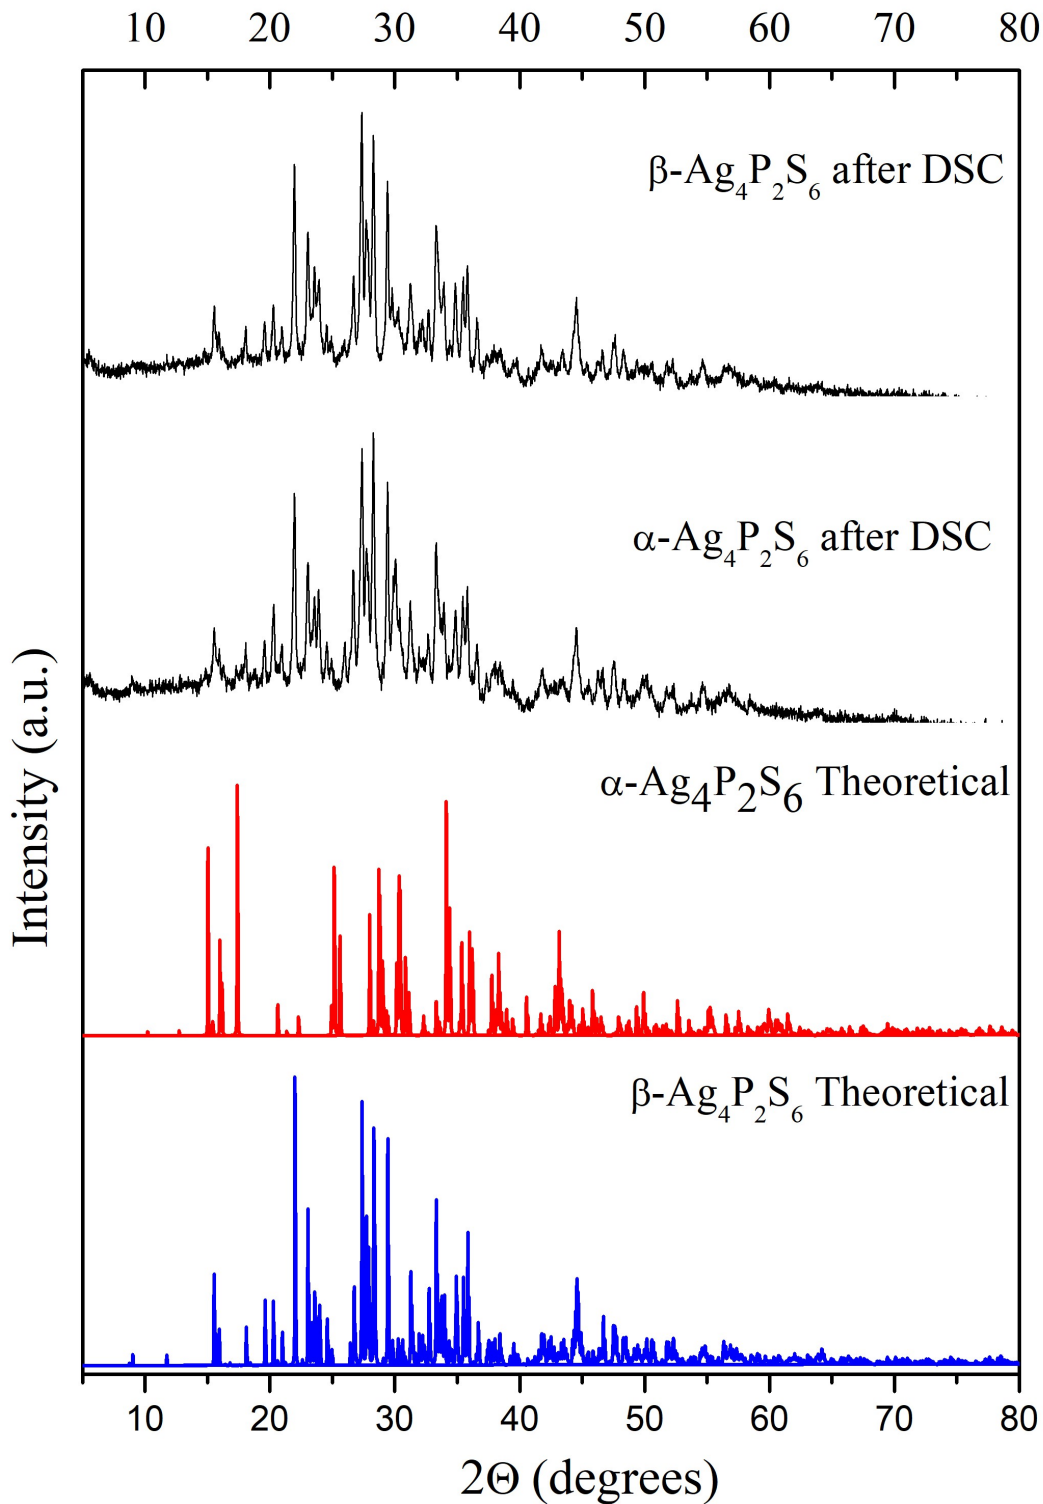

**Figure S7.** PXRD results of  $\alpha$ -Ag<sub>4</sub>P<sub>2</sub>S<sub>6</sub> samples annealed and quenched at different temperatures. The theoretical patterns are listed at the bottom. The annealing process details: the target crystals were sealed and heated to the target temperature with holding for 10 hours and then quenched in



air. The quenching process detail: the target crystals were sealed and heated to 1173K first then cooled down to the target temperature and then quenched in iced water.

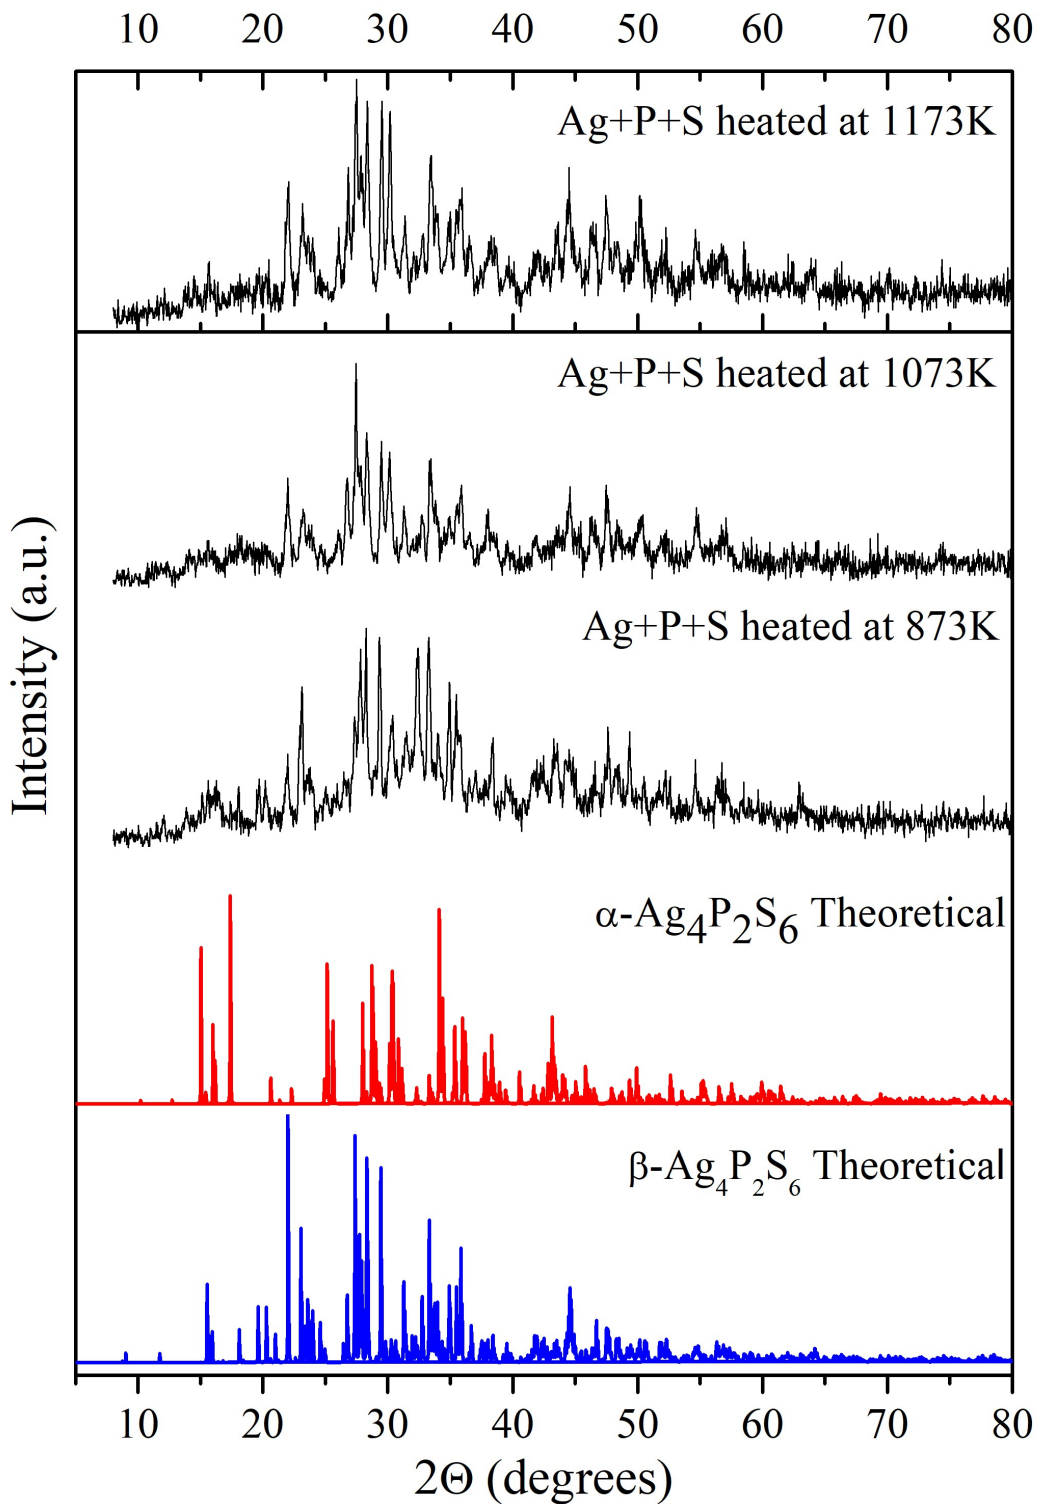

**Figure S8.** PXRD results of samples synthesized via heating Ag+P+S elements at different temperatures. The theoretical patterns are listed at the bottom.

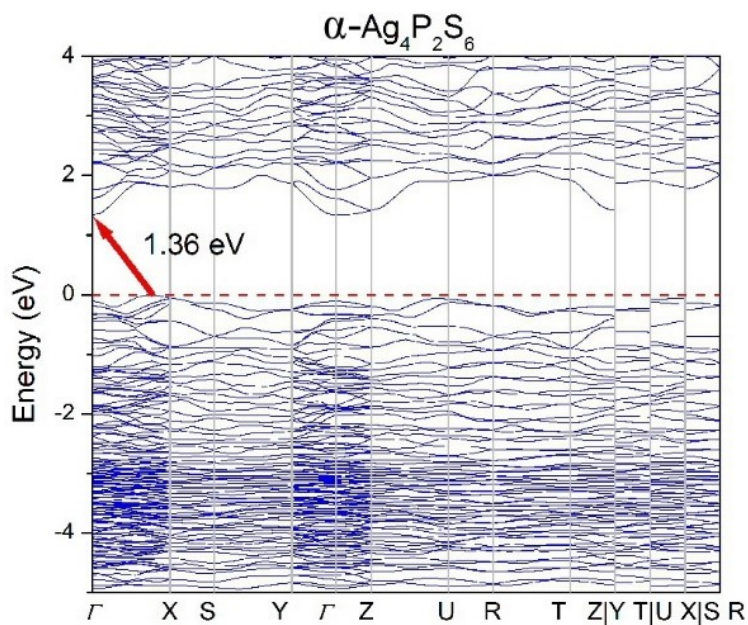

**Figure S9.** Calculated band structure of  $\alpha\text{-Ag}_4\text{P}_2\text{S}_6$  from VASP.

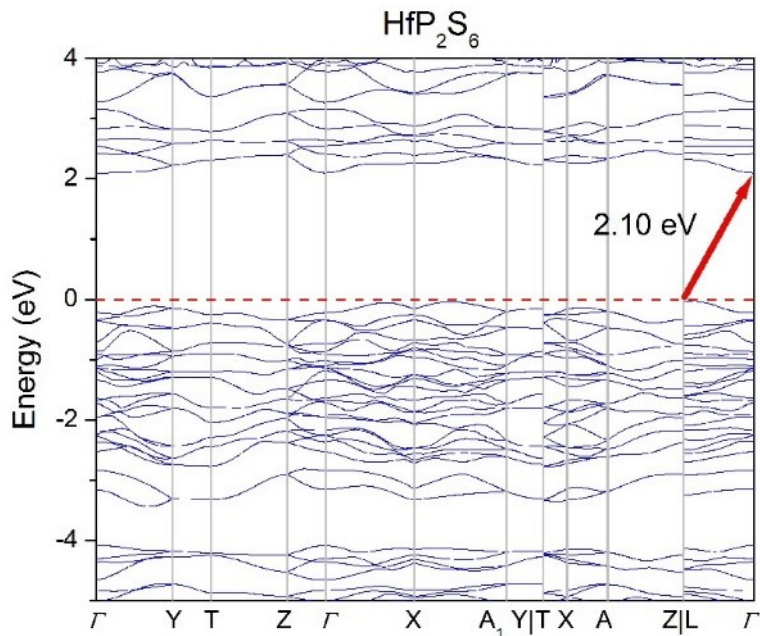

**Figure S10.** Calculated band structure of  $\text{HfP}_2\text{S}_6$  from VASP.

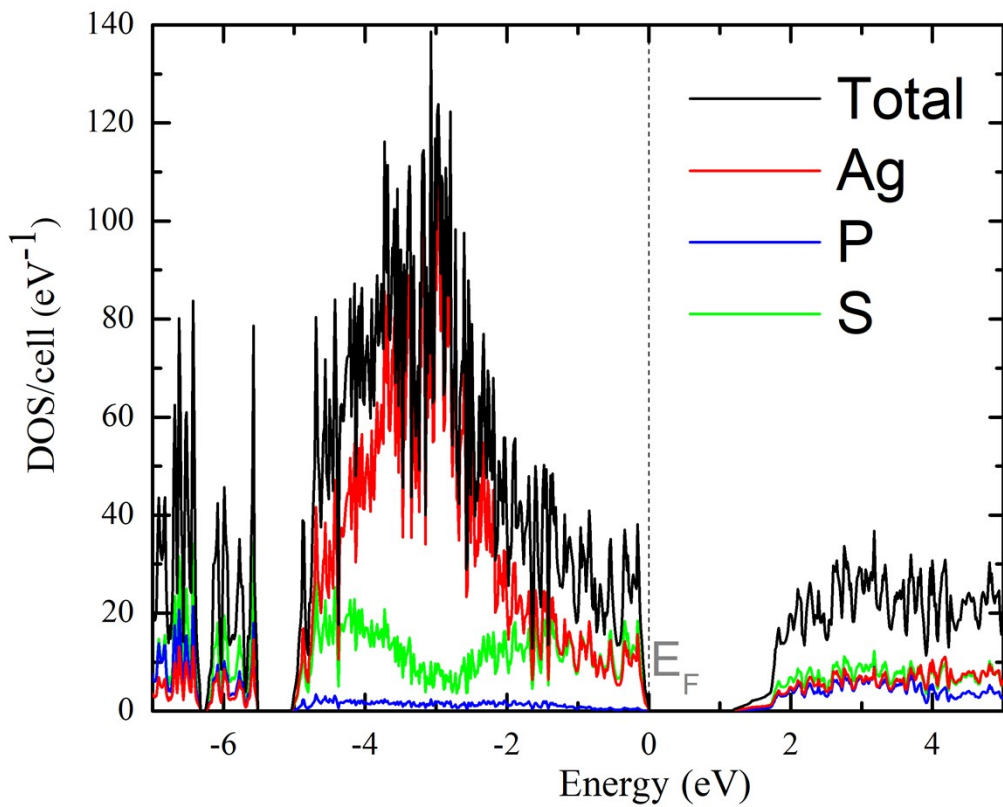

**Figure S11.** Density of states of  $\alpha$ - $\text{Ag}_4\text{P}_2\text{S}_6$  calculated by TB-LMTO-ASA.

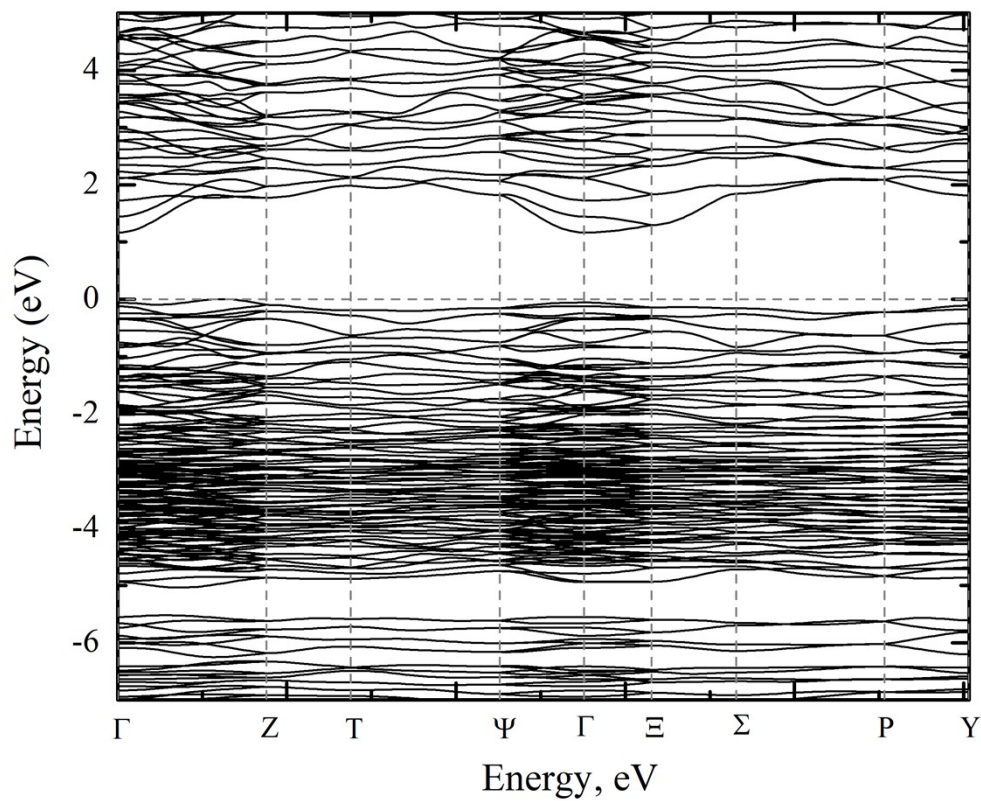

**Figure S12.** Band structure of  $\alpha\text{-Ag}_4\text{P}_2\text{S}_6$  calculated by TB-LMTO-ASA.

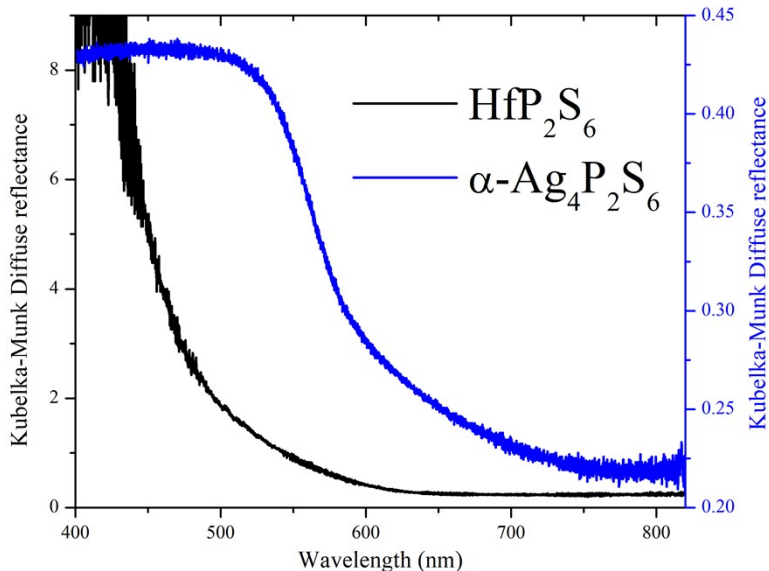

**Figure S13.** The Kubelka-Munk diffuse reflectance plots of  $\text{HfP}_2\text{S}_6$  (black) and  $\alpha\text{-Ag}_4\text{P}_2\text{S}_6$  (blue).

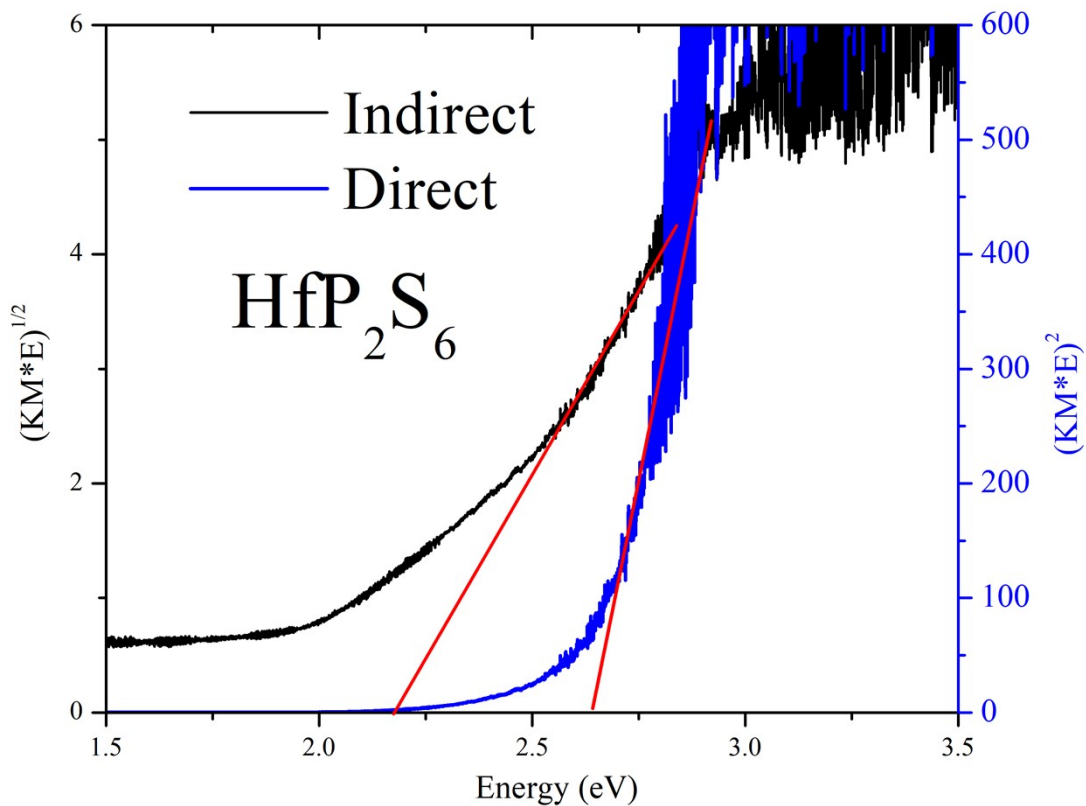

**Figure S14.** Tauc plots for allowed direct and indirect transitions of  $\text{HfP}_2\text{S}_6$

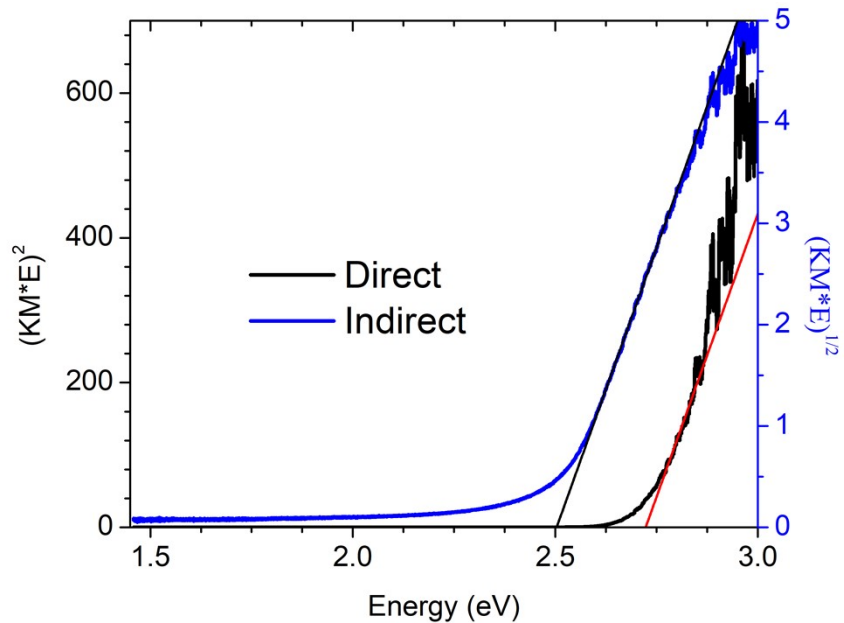

**Figure S15.** Tauc plots for allowed direct and indirect transitions of  $\alpha\text{-Ag}_4\text{P}_2\text{S}_6$ .

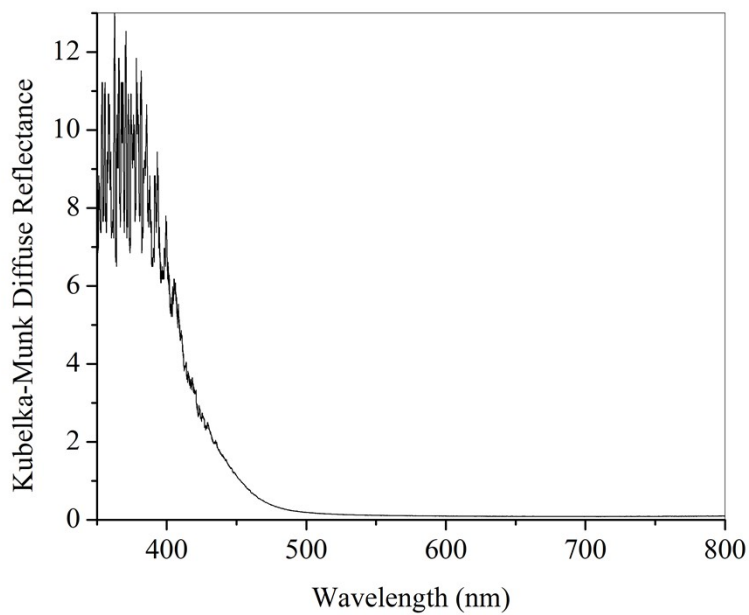

**Figure S16.** The Kubelka-Munk diffuse reflectance plots of  $\beta\text{-Ag}_4\text{P}_2\text{S}_6$ .

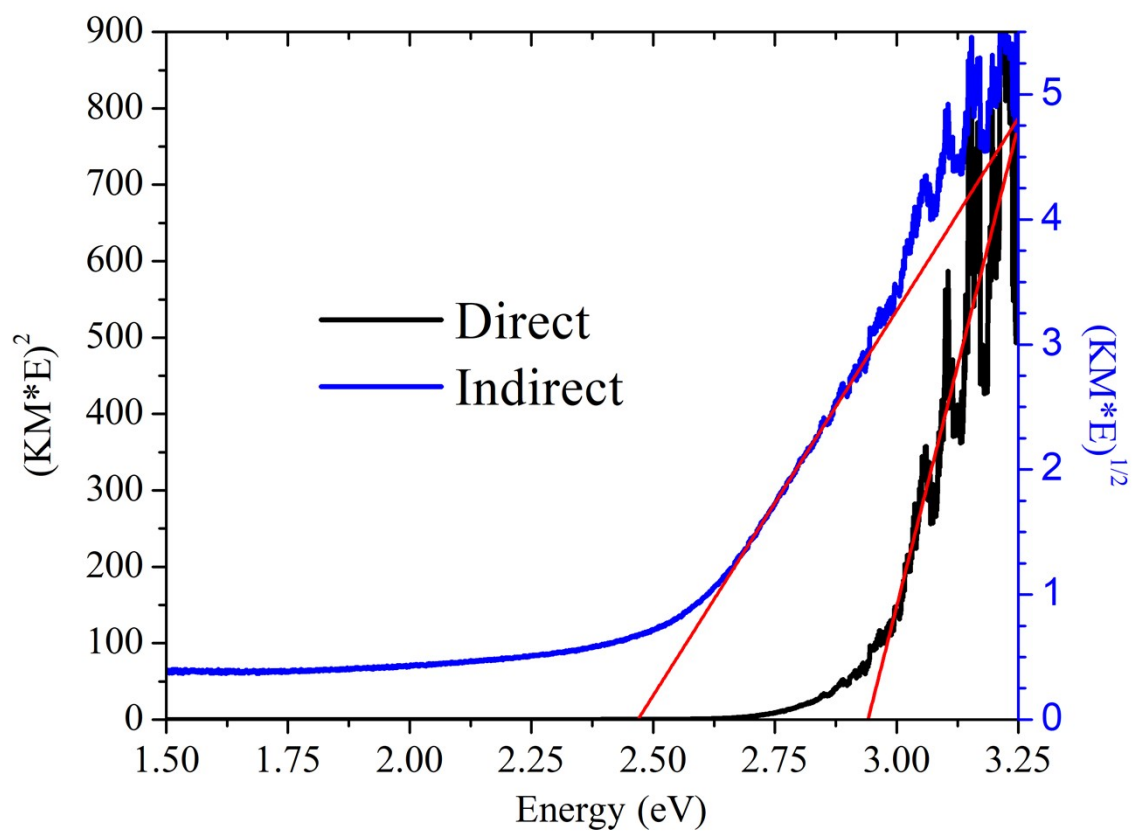

**Figure S17.** Tauc plots for allowed direct and indirect transitions of  $\beta\text{-Ag}_4\text{P}_2\text{S}_6$ .

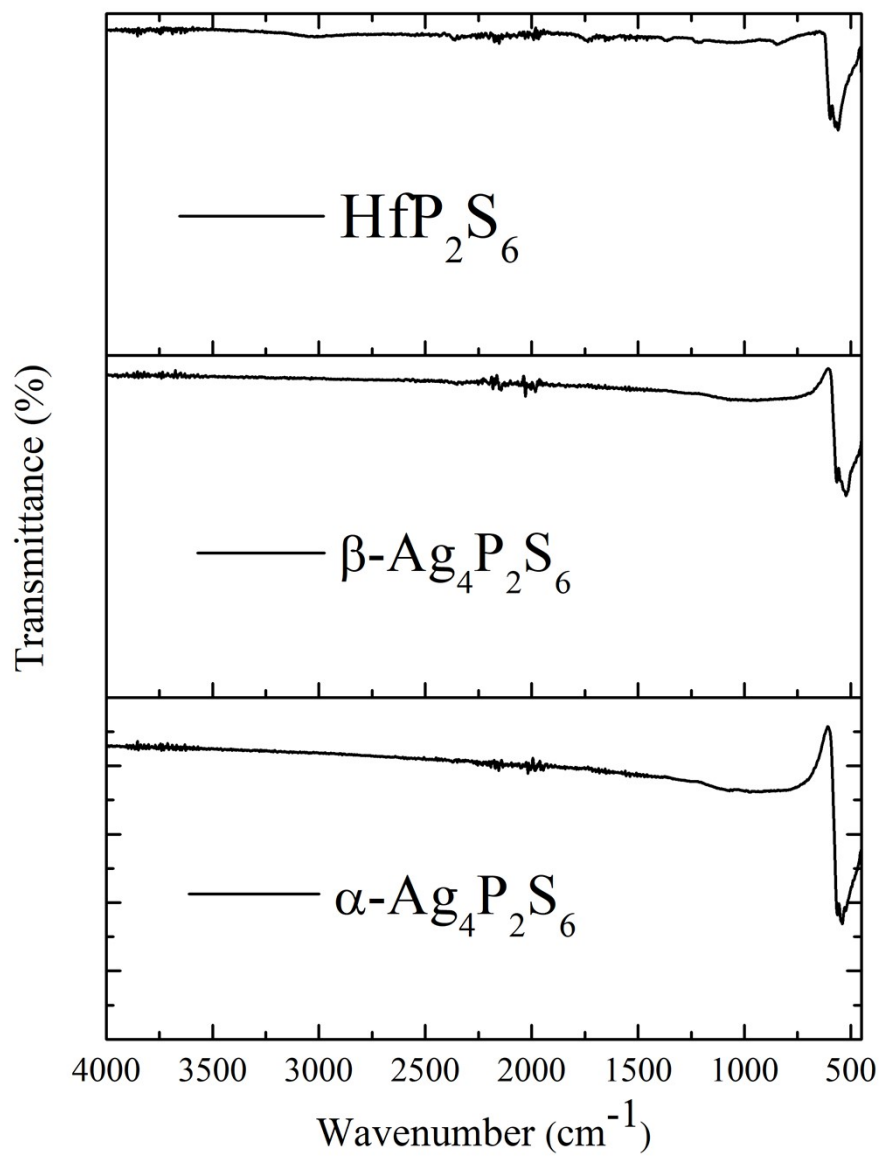

**Figure S18.** IR spectrum of HfP<sub>2</sub>S<sub>6</sub>, α-Ag<sub>4</sub>P<sub>2</sub>S<sub>6</sub>, and β-Ag<sub>4</sub>P<sub>2</sub>S<sub>6</sub>.



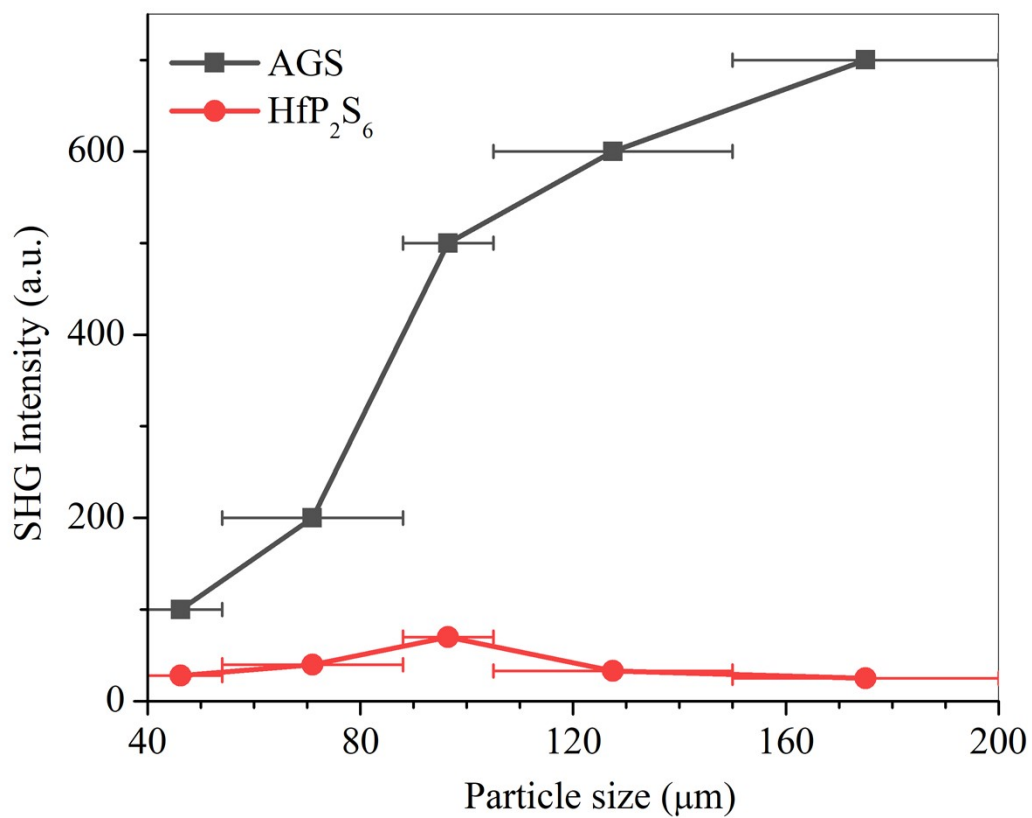

**Figure S19.** SHG intensities of HfP<sub>2</sub>S<sub>6</sub> and AgGaS<sub>2</sub> were measured on variable particle size samples utilizing a 2.09 μm laser.



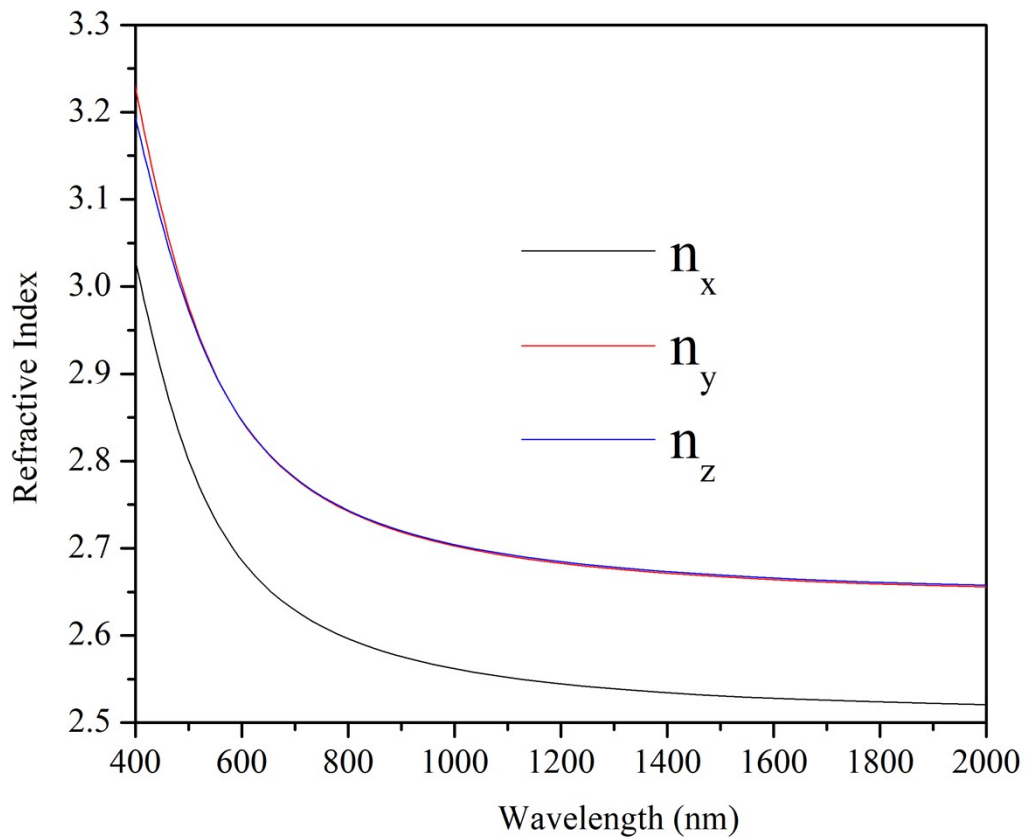

**Figure S20.** Calculated birefringence of  $\alpha$ - $\text{Ag}_4\text{P}_2\text{S}_6$  versus wavelength of the fundamental light.

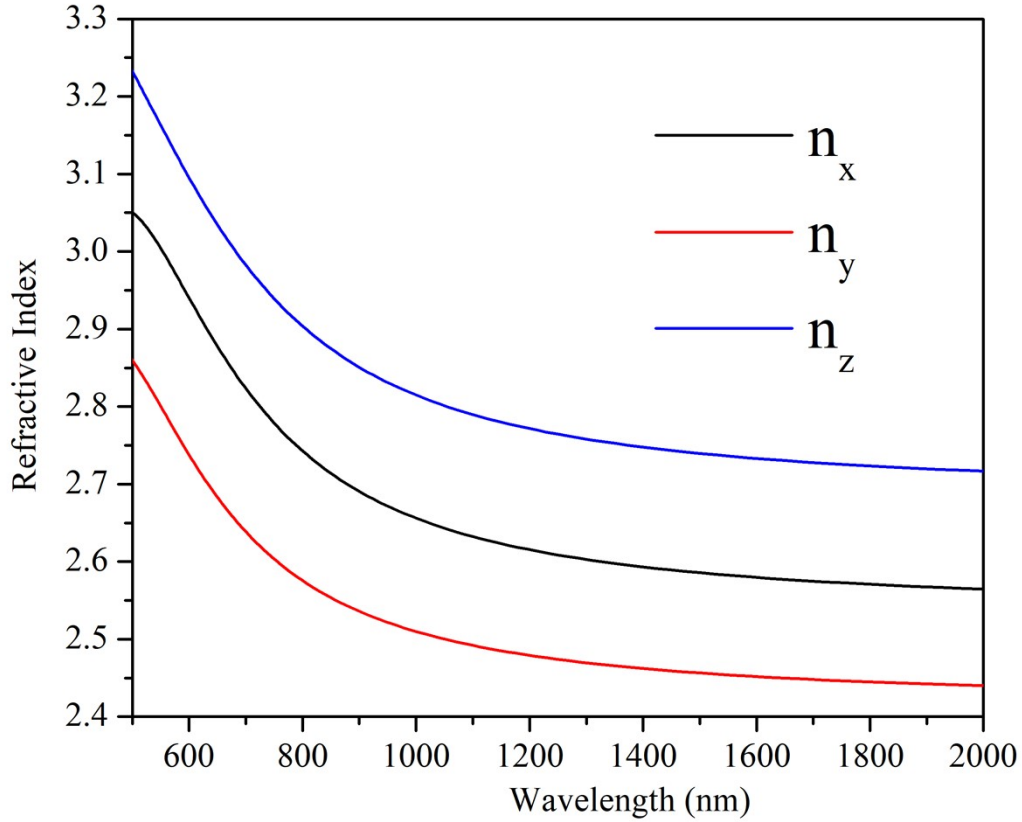

**Figure S21.** Calculated birefringence of  $\text{HfP}_2\text{S}_6$  versus wavelength of the fundamental light.

**Table S1.** LDT measurement results of  $\text{Ag}_4\text{P}_2\text{S}_6$  and  $\text{AgGaS}_2$  @ 1064 nm measured at samples of particle size of 225  $\mu\text{m}$ .

|                                          | <b>damage energy<br/>(mJ)</b> | <b>spot diameter<br/>(mm)</b> | <b>LDT (<math>\text{MW}/\text{cm}^2</math>)</b> | <b>LDT (<math>\times</math> AGS)</b> |
|------------------------------------------|-------------------------------|-------------------------------|-------------------------------------------------|--------------------------------------|
| $\text{AgGaS}_2$                         | 0.58                          | 0.5                           | 29.6                                            | 1                                    |
| $\alpha\text{-Ag}_4\text{P}_2\text{S}_6$ | 1.85                          | 0.5                           | 94                                              | 3.2                                  |

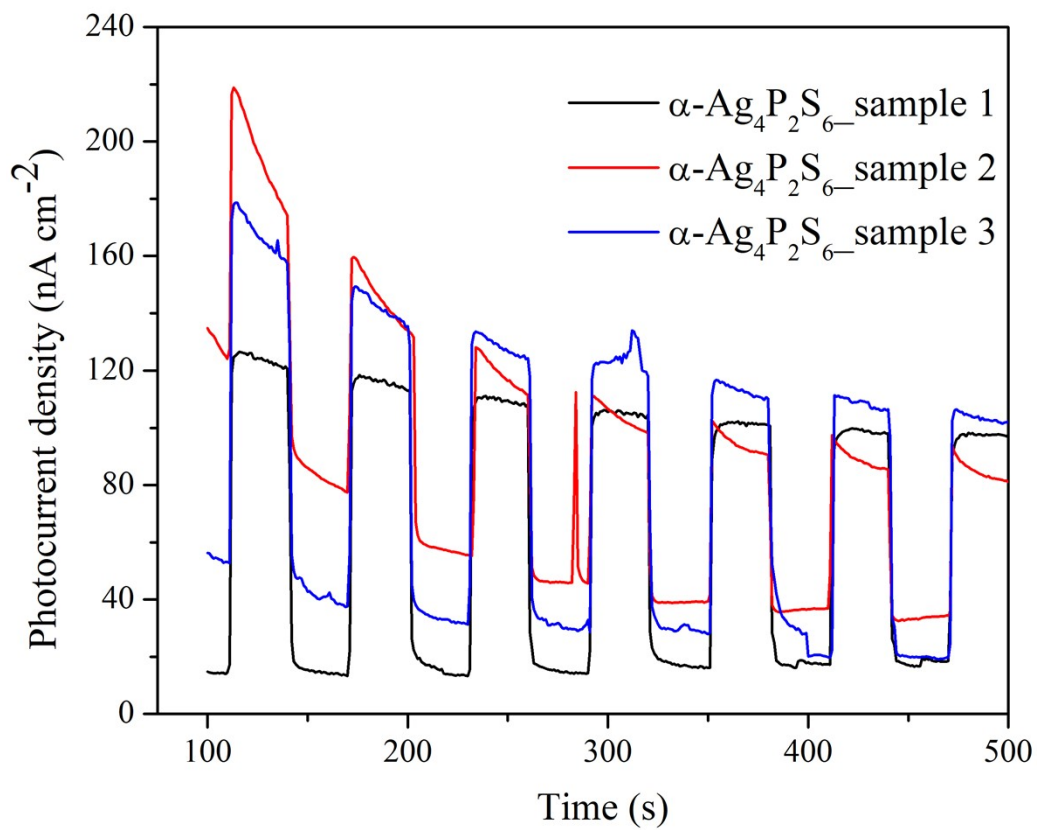

**Figure S22.** Photocurrent density of three samples of  $\alpha\text{-Ag}_4\text{P}_2\text{S}_6$ .

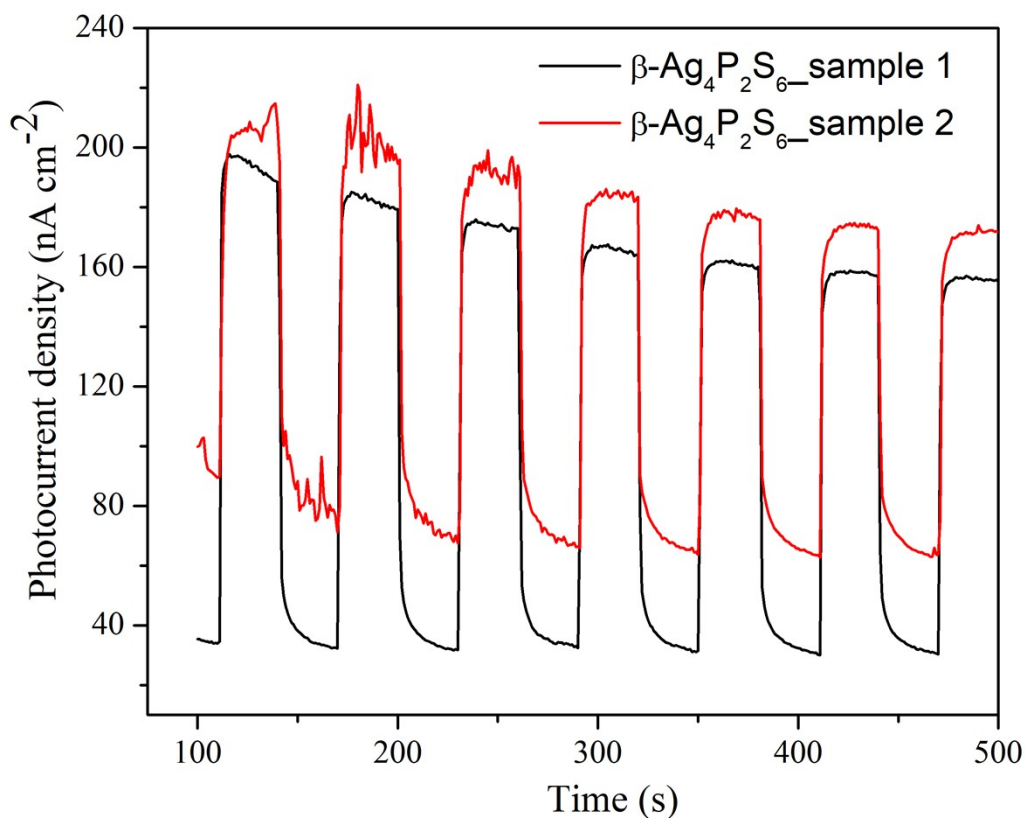

**Figure S23.** Photocurrent density of two samples of  $\beta\text{-Ag}_4\text{P}_2\text{S}_6$ .

**Table S2.** Photocurrent response of selected sulfides (ranked by photocurrent density from highest to lowest)

| Compounds                                                   | Photocurrent density               | References |
|-------------------------------------------------------------|------------------------------------|------------|
| $\text{Ba}_5\text{Bi}_2\text{Co}_2\text{S}_{10}$            | $4 \text{ mA cm}^{-2}$             | 1          |
| $\text{KCu}_2\text{BiS}_3$                                  | $0.11 \text{ mA cm}^{-2}$          | 2          |
| $\text{Pb}_3\text{P}_2\text{S}_8$                           | $45 \text{ }\mu\text{A cm}^{-2}$   | 3          |
| $\text{Ba}_3\text{HgGa}_2\text{S}_7$                        | $12.2 \text{ }\mu\text{A cm}^{-2}$ | 4          |
| $\text{Rb}_2\text{CuSb}_7\text{S}_{12}$                     | $10 \text{ }\mu\text{A cm}^{-2}$   | 5          |
| $\text{Eu}_8\text{In}_{17.33}\text{S}_{34}$                 | $1 \text{ }\mu\text{A cm}^{-2}$    | 6          |
| $\text{CsCuS}_4$                                            | $0.55 \text{ }\mu\text{A cm}^{-2}$ | 7          |
| $\text{SrCuSbS}_3$                                          | $0.54 \text{ }\mu\text{A cm}^{-2}$ | 8          |
| $\alpha\text{-Ag}_4\text{P}_2\text{S}_6$                    | $165 \text{ nA cm}^{-2}$           | This work  |
| $\beta\text{-Ag}_4\text{P}_2\text{S}_6$                     | $135 \text{ nA cm}^{-2}$           | This work  |
| $\text{BaCuSbS}_3$                                          | $55 \text{ nA cm}^{-2}$            | 9          |
| $\text{Cs}_2\text{Ag}_2\text{Zn}_2\text{S}_4$               | $50 \text{ nA cm}^{-2}$            | 10         |
| $\text{Rb}_2\text{Ba}_3\text{Cu}_2\text{Sb}_2\text{S}_{10}$ | $6 \text{ nA cm}^{-2}$             | 11         |
| $\text{TlHgInS}_3$                                          | $0.35 \text{ nA cm}^{-2}$          | 12         |

## References:

1. K. Bu, X. Zhang, J. Huang, M. Luo, C. Zheng, R. Wang, D. Wang, J. He, W. Zhao, X. Che and F. Huang, *Chem. Commun. (Camb.)*, 2019, **55**, 4809–4812.
2. G. Zhang, B. Zhang, H. Chen, X. Zhang, C. Zheng, J. Lin and F. Huang, *J. Alloys Compd.*, 2014, **591**, 6–10.
3. B. Ji, E. Guderjahn, K. Wu, T. H. Syed, W. Wei, B. Zhang and J. Wang, *Phys. Chem. Chem. Phys.*, 2021, **23**, 23696–23702.
4. X. Huang, S.-H. Yang, W. Liu and S.-P. Guo, *Inorg. Chem.*, 2022, **61**, 12954–12958.
5. Y. Xiao, S.-H. Zhou, R. Yu, Y. Shen, Z. Ma, H. Lin and Y. Liu, *Inorg. Chem.*, 2021, **60**, 9263–9267.
6. Y. Chi, T.-F. Jiang, H.-G. Xue and S.-P. Guo, *Inorg. Chem.*, 2019, **58**, 3574–3577.
7. Q.-N. Yan, B.-W. Liu, X.-M. Jiang, J.-X. Zhao, S.-M. Pei, W.-F. Chen and G.-C. Guo, *Dalton Trans.*, 2022, **51**, 5561–5566.
8. X. Zhang, J. He, R. Wang, K. Bu, J. Li, C. Zheng, J. Lin and F. Huang, *Sol. RRL*, 2018, **2**, 1800021.
9. . Liu, P. Hou, W. Chai, J. Tian, X. Zheng, Y. Shen, M. Zhi, C. Zhou and Y. Liu, *J. Alloys Compd.*, 2016, **679**, 420–425.
10. Y. Liu, D. Xuan, Z. Song, L. Geng, B. Zhang and T. Liu, *J. Solid State Chem.*, 2022, **315**, 123457.
11. C. Liu, Y. Xiao, H. Wang, W. Chai, X. Liu, D. Yan, H. Lin and Y. Liu, *Inorg. Chem.*, 2020, **59**, 1577–1581.
12. H. Li, C. D. Malliakas, F. Han, D. Y. Chung and M. G. Kanatzidis, *Chem. Mater.*, 2015, **27**, 5417–5424.
